# Supplementary material for: Cyclic and polycyclic tellurium–tin and tellurium–lead compounds – synthesis, structures and thermal decomposition
Source: Royal Society of Chemistry journal article supplement (doi:10.1039/c2cc32615a), 2012-01-01
Supplement: c2cc32615a.pdf [file c2cc32615a.pdf]

## Cyclic and polycyclic tellurium tin and tellurium lead compounds – species between molecules and the solid phase\*\*

S. Traut,<sup>a</sup> C. v. Hänisch<sup>\*a</sup>, A. P. Hähnel,<sup>b</sup> S. Stahl.<sup>b</sup>

[a] Fachbereich Chemie, Philipps Universität Marburg, Hans-Meerwein-Straße, D-35032 Marburg, Germany. E-mail: haenisch@chemie.uni-marburg.de

[b] Institut für Nanotechnologie, KIT, Campus Nord, Postfach 3640, D-76021, Karlsruhe, Germany

### Supplementary information

#### Experimental Details

All manipulations were performed under rigorous exclusion of oxygen and moisture using a Schlenk line and argon atmosphere. Solvents were dried and freshly distilled before use. The starting materials were prepared according to literature:  $t\text{Bu}_2\text{PhSiTeNa}(\text{thf})_2$ ,<sup>[i]</sup>  $(\text{Me}_3\text{Si})_3\text{SiTeSiMe}_3$ <sup>[ii]</sup> and  $(\text{Me}_3\text{Si})_3\text{CPbCl}$ <sup>[iii]</sup>. NMR spectra were recorded using a “Bruker Avance III (500 MHz)” spectrometer and were referenced internally to the deuterated solvent.  $\text{C}_6\text{D}_6$  was dried over Na/benzophenone. EI-MS spectra were recorded on a “Varian MAT 3830 (70 eV)”.

#### $t\text{Bu}_2\text{PhSiTeSiMe}_3$ (**1**):

At room temperature,  $\text{Me}_3\text{SiCl}$  (14.1 mmol; 1.8 ml) was added to a suspension of  $t\text{Bu}_2\text{PhSiTeNa}(\text{thf})_2$  (8.28 mmol; 4.26 g) in 200 ml *n*heptane. After stirring for additional 16 h, the solvent was removed under vacuum. The residue was suspended in 50 ml *n*pentane, and the precipitated NaCl was subsequently removed by centrifugation. After removal of the solvent, **1** was obtained as green oil (3.18 g; 91%).  $^1\text{H}$  NMR ( $\text{C}_6\text{D}_6$ ):  $\delta$  = 0.35 [s,  $\text{SiCH}_3$ , 9H], 1.26 [s,  $\text{C}(\text{CH}_3)_3$ , 18H], 7.06-7.11 [m, ortho + para Ph, 3H], 7.94-7.97 [m, meta Ph, 2H];  $^{13}\text{C}\{^1\text{H}\}$  NMR ( $\text{C}_6\text{D}_6$ ):  $\delta$  = 5.6 [s,  $\text{SiCH}_3$ ], 22.8 [s,  $\text{C}(\text{CH}_3)_3$ ], 30.3 [s,  $\text{CH}_3$ ], 127.7 [s, Ph], 129.6 [s, Ph], 134.8 [s, Ph], 137.7 [s, Ph];  $^{29}\text{Si}\{^1\text{H}\}$  NMR ( $\text{C}_6\text{D}_6$ ):  $\delta$  = -5.6 [s,  $\text{SiMe}_3$ ], 30.9 [s,  $\text{Si}t\text{Bu}_2\text{Ph}$ ];  $^{125}\text{Te}$  NMR ( $\text{C}_6\text{D}_6$ ): -998.3 [s]; MS (EI, 70 eV)  $m/z$  (%): 348.8 [ $\text{M}^+$  -  $\text{SiMe}_3$ ] (8), 73.1 [ $\text{SiMe}_3^+$ ] (100); IR (KBr):  $\nu$  = 484 (vs), 574 (s), 622 (s), 701 (s), 737 (s), 751 (m), 814 (vs), 840 (vs), 935 (m), 1010 (s), 1097 (vs), 1193 (m), 1247 (vs), 1364 (s), 1388 (s), 1427 (vs), 1471 (vs), 1820 (vw), 1888 (vw), 1956 (vw), 2859 (vs), 2888 (vs), 2953 (vs), 3046 (m), 3068 (m).

### **[(*t*Bu<sub>2</sub>PhSiTe)<sub>4</sub>Sn<sub>2</sub>] (2):**

A solution of *t*Bu<sub>2</sub>PhSiTeSiMe<sub>3</sub> (1 mmol; 3.3 ml; 0.3 M in Et<sub>2</sub>O) was added to a solution of SnCl<sub>2</sub> (0.5 mmol; 0.095 g) in 15 ml Et<sub>2</sub>O at -74°C. The yellow solution was allowed to warm up to room temperature and was stirred for additional 30 min. The solvent was removed under vacuum, and the residual solid was dissolved in 5 ml of toluene. After 2 days, yellow rods could be obtained at -35°C. Yield: 162 mg (40%). Elemental analysis: calc. for Te<sub>4</sub>Sn<sub>2</sub>Si<sub>4</sub>C<sub>56</sub>H<sub>92</sub>: C 41.38%, H 5.70%; found: C 41.36%, H 5.80%. <sup>1</sup>H NMR (C<sub>6</sub>D<sub>6</sub>): δ = 1.29 [s, CH<sub>3</sub>, 18H], 7.11 [t, para Ph, <sup>3</sup>J<sub>H,H</sub> = 7.2 Hz, 1H], 7.17 [t, meta Ph, <sup>3</sup>J<sub>H,H</sub> = 7.2 Hz, 2H], 8.01 [d, ortho Ph, <sup>3</sup>J<sub>H,H</sub> = 7.2 Hz, 2H]; <sup>13</sup>C{<sup>1</sup>H} NMR (C<sub>6</sub>D<sub>6</sub>): δ = 23.9 [s, C(CH<sub>3</sub>)<sub>3</sub>], 30.6 [s, C(CH<sub>3</sub>)<sub>3</sub>], 128.3 [s, Ph], 129.4 [s, Ph], 136.2 [s, Ph], 137.3 [s, Ph]; <sup>29</sup>Si{<sup>1</sup>H} NMR (C<sub>6</sub>D<sub>6</sub>): δ = 34.7 [s]; <sup>125</sup>Te{<sup>1</sup>H} NMR (C<sub>6</sub>D<sub>6</sub>): δ = -715.0 [s]; IR (KBr): ν = 455 (s), 470 (vs), 484 (vs), 573 (m), 614 (m), 700 (s), 741 (m), 816 (s), 933 (w), 1010 (m), 1095 (vs), 1176 (w), 1195 (w), 1262 (w), 1363 (w), 1384 (w), 1425 (s), 1468 (m), 1816 (vw, Ph), 1882 (vw, Ph), 1950 (vw, Ph), 2855 (s), 2888 (m), 2928 (vs), 2964 (s), 3068 (w).

### **[(*t*Bu<sub>2</sub>PhSiTe)<sub>4</sub>Pb<sub>2</sub>] (3):**

A solution of *t*Bu<sub>2</sub>PhSiTeSiMe<sub>3</sub> (1 mmol; 3.3 ml; 0.3 M in Et<sub>2</sub>O) was added to a suspension of PbCl<sub>2</sub> (0.5 mmol; 0.139 g) in 15 ml Et<sub>2</sub>O at -74°C. The yellow solution was allowed to warm up to room temperature and was stirred for additional 30 min. The solvent was concentrated to 6 ml, and after 2 days, orange rods could be obtained at -35°C. Yield: 85 mg (19%). Elemental analysis: calc. for Te<sub>4</sub>Pb<sub>2</sub>Si<sub>4</sub>C<sub>56</sub>H<sub>92</sub>: C 37.32%, H 5.14%; found: C 37.71%, H 5.56%. <sup>1</sup>H NMR (C<sub>6</sub>D<sub>6</sub>): δ = 1.26 [s, CH<sub>3</sub>, 18H], 7.12 [t, para Ph, <sup>3</sup>J<sub>H,H</sub> = 7.2 Hz, 1H], 7.20 [t, meta Ph, <sup>3</sup>J<sub>H,H</sub> = 7.2 Hz, 2H], 8.00 [d, ortho Ph, <sup>3</sup>J<sub>H,H</sub> = 7.2 Hz, 2H]; <sup>13</sup>C{<sup>1</sup>H} NMR (C<sub>6</sub>D<sub>6</sub>): δ = 23.9 [s, C(CH<sub>3</sub>)<sub>3</sub>], 30.6 [s, C(CH<sub>3</sub>)<sub>3</sub>], 128.3 [s, Ph], 129.4 [s, Ph], 136.1 [s, Ph], 137.2 [s, Ph]; <sup>29</sup>Si{<sup>1</sup>H} NMR (C<sub>6</sub>D<sub>6</sub>): δ = 25.7 [s]; IR (KBr): ν = 456 (s), 473 (vs), 572 (m), 613 (m), 701 (s), 740 (m), 815 (vs), 1010 (s), 1094 (vs), 1262 (s), 1362 (m), 1385 (m), 1426 (s), 1468 (m), 1887 (vw), 1953 (vw), 2031 (vw), 2342 (w), 2856 (s), 2884 (m), 2929 (s), 3071 (w).

**[*t*Bu<sub>2</sub>PhSiTePbC(SiMe<sub>3</sub>)<sub>3</sub>]<sub>2</sub> (4):**

A solution of *t*Bu<sub>2</sub>PhSiTeSiMe<sub>3</sub> (0.8 mmol; 3.0 ml; 0.3 M in Et<sub>2</sub>O) was added to a suspension of (Me<sub>3</sub>Si)<sub>3</sub>CPbCl (0.8 mmol; 0.379 g) in 15 ml Et<sub>2</sub>O at -74°C. The red solution was allowed to warm up to room temperature and was stirred for additional 30 min. The dark precipitate was removed by filtration, and the solvent was concentrated to 6ml. At -35°C, red rods of **4** were obtained. Yield: 301 mg (48%). Elemental analysis: calc. for Te<sub>2</sub>Pb<sub>2</sub>Si<sub>8</sub>C<sub>48</sub>H<sub>100</sub>: C 36.68%, H 6.41%; found: C 36.98%, H 6.13%. Because of the instability of compound **4** in solution no satisfying NMR spectra could be obtained. IR (KBr):  $\nu$  = 453 (m), 481 (s), 542 (m), 572 (m), 614 (m), 647 (m), 672 (m), 701 (m), 736 (m), 856 (vs), 1008 (m), 1096 (m), 1251 (m), 1362 (w), 1386 (w), 1426 (w), 1492 (w), 2856 (m), 2890 (m), 2931 (m), 3070(vw).

**[{(Me<sub>3</sub>Si)<sub>3</sub>SiTe}<sub>4</sub>Te<sub>2</sub>Sn<sub>4</sub>] (5):**

A solution of (Me<sub>3</sub>Si)<sub>3</sub>SiTeSiMe<sub>3</sub> (1 mmol; 5 ml; 0.2 M in Et<sub>2</sub>O) was added to a solution of SnCl<sub>2</sub> (0.5 mmol; 0.095 g) in 10 ml Et<sub>2</sub>O at -74°C. The yellow solution was allowed to warm up to room temperature and was stirred for additional 30 min. The solvent was concentrated to 4 ml, and after 5 days, red crystals could be obtained at -35°C. Yield: 70 mg (19%). Elemental analysis: calc. for Te<sub>6</sub>Sn<sub>4</sub>Si<sub>16</sub>C<sub>36</sub>H<sub>108</sub>: C 19.38%, H 4.88%; found C 19.37%, H 4.89%. <sup>1</sup>H NMR (C<sub>6</sub>D<sub>6</sub>):  $\delta$  = 0.42 [s, CH<sub>3</sub>, 27H]; <sup>13</sup>C{<sup>1</sup>H} NMR (C<sub>6</sub>D<sub>6</sub>):  $\delta$  = 2.47 [s]; <sup>29</sup>Si{<sup>1</sup>H} NMR (C<sub>6</sub>D<sub>6</sub>):  $\delta$  = -92.3 [s, broad], -9.6 [s]; MS (EI, 70 eV) m/z (%): 750.1 [*hyp*<sub>2</sub>Te<sub>2</sub><sup>+</sup>] (13), 375.1 [*hyp*Te<sup>+</sup>] (100), 303.1 [*hyp*Te<sup>+</sup> - Me] (23), 73 [Me<sub>3</sub>Si<sup>+</sup>] (100); IR (KBr):  $\nu$  = 621 (m), 689 (m) 834 (vs), 856 (m) 1019 (w), 1098 (w), 1243 (m), 1258 (w), 1393 (w), 2885 (w), 2946 (m).

## Thermogravimetric analysis under helium gas flow

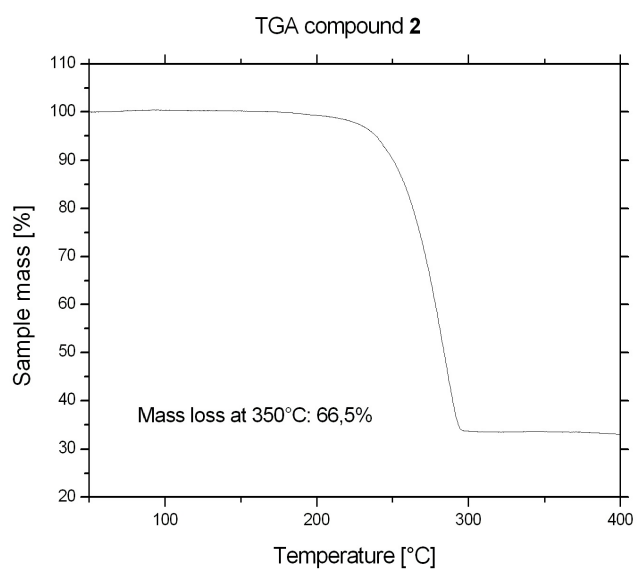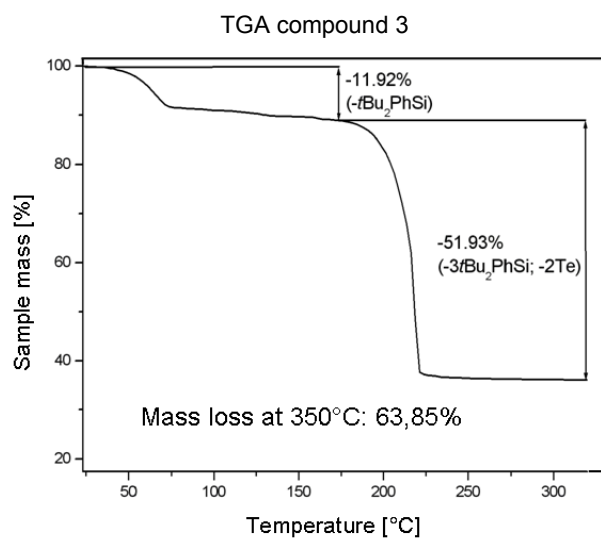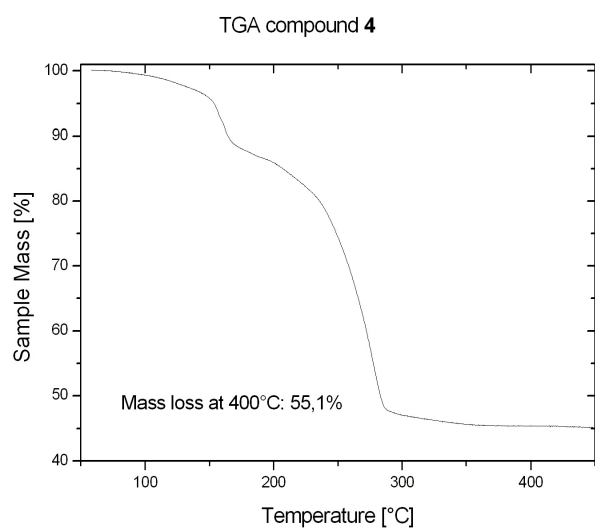

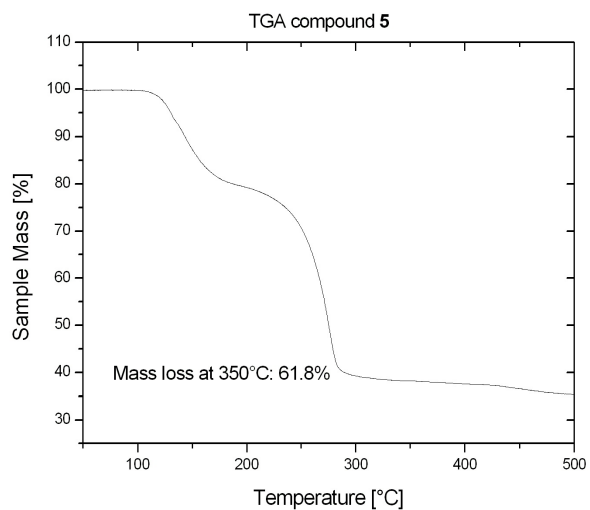

### Compounds 5 (right) in comparison with the unit cell of cubic SnTe (left)

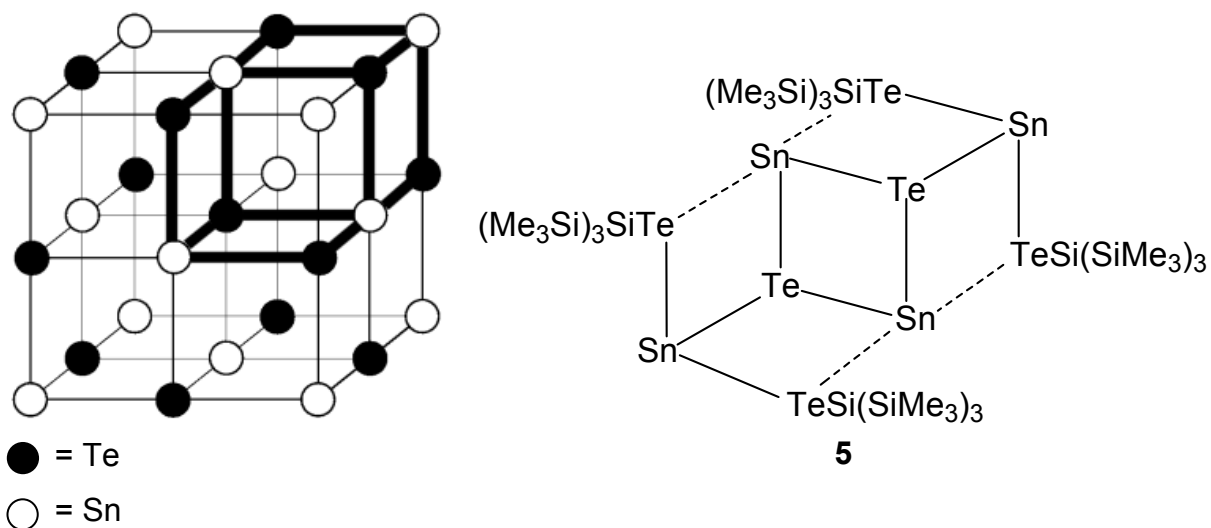

### Temperature dependent $^1\text{H}$ NMR investigations of compound 2

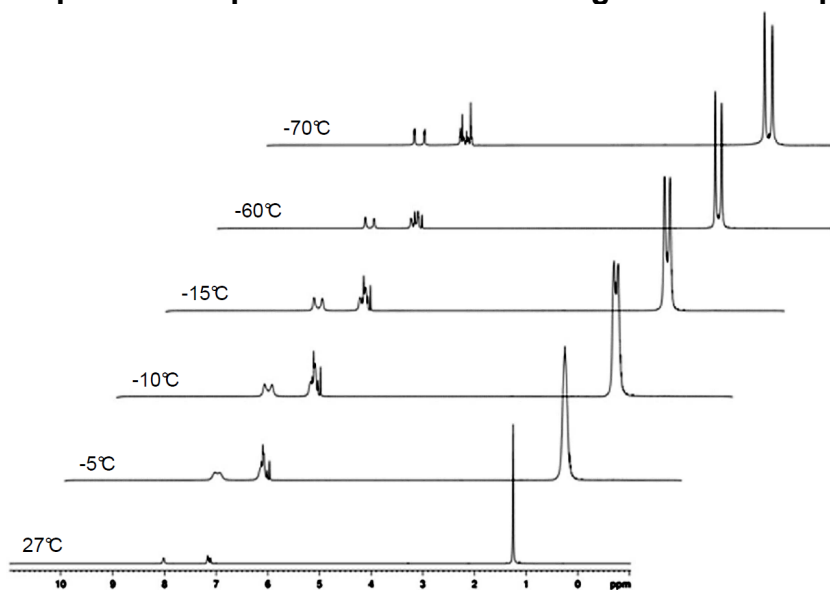

## X-ray data of the compounds 2-5

### Compound 2:

|                                   |                                                                                 |                                                              |
|-----------------------------------|---------------------------------------------------------------------------------|--------------------------------------------------------------|
| Empirical formula                 | C <sub>56</sub> H <sub>92</sub> Si <sub>4</sub> Sn <sub>2</sub> Te <sub>4</sub> |                                                              |
| Formula weight                    | 1625.44                                                                         |                                                              |
| Temperature                       | 180(2) K                                                                        |                                                              |
| Wavelength                        | 0.71073 Å                                                                       |                                                              |
| Crystal system, space group       | Monoclinic, P2(1)/c                                                             |                                                              |
| Unit cell dimensions              | a = 29.684(3) Å<br>b = 8.3463(5) Å<br>c = 30.084(3) Å                           | alpha = 90 deg.<br>beta = 118.768(6) deg.<br>gamma = 90 deg. |
| Volume                            | 6533.5(9) Å <sup>3</sup>                                                        |                                                              |
| Z, Calculated density             | 4,                                                                              | 1.652 g/m <sup>3</sup>                                       |
| Absorption coefficient            | 2.620 mm <sup>-1</sup>                                                          |                                                              |
| F(000)                            | 3168                                                                            |                                                              |
| Crystal size                      | 0.449 x 0.029 x 0.024 mm                                                        |                                                              |
| Theta range for data collection   | 1.54 to 22.73 deg.                                                              |                                                              |
| Limiting indices                  | -32<=h<=31, -9<=k<=8, -32<=l<=32                                                |                                                              |
| Reflections collected / unique    | 24640 / 8634 [R(int) = 0.1726]                                                  |                                                              |
| Completeness to theta = 22.73     | 98.3 %                                                                          |                                                              |
| Absorption correction             | Semi-empirical from equivalents                                                 |                                                              |
| Max. and min. transmission        | 0.6244 and 0.5677                                                               |                                                              |
| Refinement method                 | Full-matrix least-squares on F <sup>2</sup>                                     |                                                              |
| Data / restraints / parameters    | 8634 / 96 / 595                                                                 |                                                              |
| Goodness-of-fit on F <sup>2</sup> | 0.815                                                                           |                                                              |
| Final R indices [I>2sigma(I)]     | R1 = 0.0716, wR2 = 0.0895                                                       |                                                              |
| R indices (all data)              | R1 = 0.1948, wR2 = 0.1230                                                       |                                                              |
| Largest diff. peak and hole       | 0.665 and -0.731 e.Å <sup>-3</sup>                                              |                                                              |

### Compound 3

|                                   |                                                                                 |                                                            |
|-----------------------------------|---------------------------------------------------------------------------------|------------------------------------------------------------|
| Empirical formula                 | C <sub>56</sub> H <sub>92</sub> Pb <sub>2</sub> Si <sub>4</sub> Te <sub>4</sub> |                                                            |
| Formula weight                    | 1802.44                                                                         |                                                            |
| Temperature                       | 180(2) K                                                                        |                                                            |
| Wavelength                        | 0.71073 Å                                                                       |                                                            |
| Crystal system, space group       | Monoclinic, C2/c                                                                |                                                            |
| Unit cell dimensions              | a = 25.621(7) Å<br>b = 8.1720(16) Å<br>c = 31.760(6) Å                          | alpha = 90 deg.<br>beta = 90.06(3) deg.<br>gamma = 90 deg. |
| Volume                            | 6650(3) Å <sup>3</sup>                                                          |                                                            |
| Z, Calculated density             | 4, 1.800 g/cm <sup>3</sup>                                                      |                                                            |
| Absorption coefficient            | 6.880 mm <sup>-1</sup>                                                          |                                                            |
| F(000)                            | 3424                                                                            |                                                            |
| Crystal size                      | 0.4520 x 0.1180 x 0.0420 mm                                                     |                                                            |
| Theta range for data collection   | 1.28 to 25.63 deg.                                                              |                                                            |
| Limiting indices                  | -31<=h<=30, -9<=k<=6, -38<=l<=36                                                |                                                            |
| Reflections collected / unique    | 14149 / 5785 [R(int) = 0.0503]                                                  |                                                            |
| Completeness to theta = 25.63     | 92.1 %                                                                          |                                                            |
| Absorption correction             | Integration                                                                     |                                                            |
| Max. and min. transmission        | 0.7080 and 0.1960                                                               |                                                            |
| Refinement method                 | Full-matrix least-squares on F <sup>2</sup>                                     |                                                            |
| Data / restraints / parameters    | 5785 / 0 / 310                                                                  |                                                            |
| Goodness-of-fit on F <sup>2</sup> | 0.974                                                                           |                                                            |
| Final R indices [I>2sigma(I)]     | R1 = 0.0275, wR2 = 0.0673                                                       |                                                            |
| R indices (all data)              | R1 = 0.0344, wR2 = 0.0694                                                       |                                                            |
| Largest diff. peak and hole       | 0.610 and -1.652 e·Å <sup>-3</sup>                                              |                                                            |

## Compound 4

|                                   |                                                                                  |                                                             |
|-----------------------------------|----------------------------------------------------------------------------------|-------------------------------------------------------------|
| Empirical formula                 | C <sub>48</sub> H <sub>100</sub> Pb <sub>2</sub> Si <sub>8</sub> Te <sub>2</sub> |                                                             |
| Formula weight                    | 1571.58                                                                          |                                                             |
| Temperature                       | 180(2) K                                                                         |                                                             |
| Wavelength                        | 0.71073 Å                                                                        |                                                             |
| Crystal system, space group       | Monoclinic, P2(1)/n                                                              |                                                             |
| Unit cell dimensions              | a = 13.762(6) Å<br>b = 19.778(7) Å<br>c = 25.104(13) Å                           | alpha = 90 deg.<br>beta = 103.36(4) deg.<br>gamma = 90 deg. |
| Volume                            | 6648(5) Å <sup>3</sup>                                                           |                                                             |
| Z, Calculated density             | 4, 1.570 g/cm <sup>3</sup>                                                       |                                                             |
| Absorption coefficient            | 6.090 mm <sup>-1</sup>                                                           |                                                             |
| F(000)                            | 3072                                                                             |                                                             |
| Crystal size                      | 0.1430 x 0.1230 x 0.0350 mm                                                      |                                                             |
| Theta range for data collection   | 1.32 to 26.79 deg.                                                               |                                                             |
| Limiting indices                  | -17<=h<=17, -24<=k<=24, -27<=l<=31                                               |                                                             |
| Reflections collected / unique    | 41516 / 14056 [R(int) = 0.0931]                                                  |                                                             |
| Completeness to theta = 26.79     | 99.0 %                                                                           |                                                             |
| Absorption correction             | Integration                                                                      |                                                             |
| Max. and min. transmission        | 0.8502 and 0.4408                                                                |                                                             |
| Refinement method                 | Full-matrix least-squares on F <sup>2</sup>                                      |                                                             |
| Data / restraints / parameters    | 14056 / 0 / 573                                                                  |                                                             |
| Goodness-of-fit on F <sup>2</sup> | 0.953                                                                            |                                                             |
| Final R indices [I>2sigma(I)]     | R1 = 0.0689, wR2 = 0.1458                                                        |                                                             |
| R indices (all data)              | R1 = 0.1312, wR2 = 0.1732                                                        |                                                             |
| Largest diff. peak and hole       | 2.439 and -2.438 e·Å <sup>-3</sup>                                               |                                                             |



## Compound 5

|                                   |                                                                                                                      |
|-----------------------------------|----------------------------------------------------------------------------------------------------------------------|
| Empirical formula                 | $C_{36}H_{108}Si_{16}Sn_4Te_6$                                                                                       |
| Formula weight                    | 2231.02                                                                                                              |
| Temperature                       | 180(2) K                                                                                                             |
| Wavelength                        | 0.71073 Å                                                                                                            |
| Crystal system, space group       | Monoclinic, P2(1)/n                                                                                                  |
| Unit cell dimensions              | a = 9.5474(19) Å    alpha = 90 deg.<br>b = 26.049(5) Å    beta = 91.70(3) deg.<br>c = 17.285(4) Å    gamma = 90 deg. |
| Volume                            | 4297.0(15) Å <sup>3</sup>                                                                                            |
| Z, Calculated density             | 2, 1.724 g/cm <sup>3</sup>                                                                                           |
| Absorption coefficient            | 3.390 mm <sup>-1</sup>                                                                                               |
| F(000)                            | 2120                                                                                                                 |
| Crystal size                      | 0.281 x 0.092 x 0.030 mm                                                                                             |
| Theta range for data collection   | 2.41 to 25.62 deg.                                                                                                   |
| Limiting indices                  | -10<=h<=11, -31<=k<=31, -20<=l<=17                                                                                   |
| Reflections collected / unique    | 19869 / 7752 [R(int) = 0.0696]                                                                                       |
| Completeness to theta = 25.62     | 95.6 %                                                                                                               |
| Absorption correction             | Integration                                                                                                          |
| Max. and min. transmission        | 0.9040 and 0.6503                                                                                                    |
| Refinement method                 | Full-matrix least-squares on F <sup>2</sup>                                                                          |
| Data / restraints / parameters    | 7752 / 0 / 280                                                                                                       |
| Goodness-of-fit on F <sup>2</sup> | 1.052                                                                                                                |
| Final R indices [I>2sigma(I)]     | R1 = 0.0411, wR2 = 0.0939                                                                                            |
| R indices (all data)              | R1 = 0.0540, wR2 = 0.0988                                                                                            |
| Largest diff. peak and hole       | 0.780 and -1.328 e·Å <sup>-3</sup>                                                                                   |

- 
- [<sup>i</sup>] T. Kückmann, M. Hermsen, M. Bolte, M. Wagner, H.-W. Lerner, *Inorg. Chem.*, **2005**, *44*, 3449-3458.
- [<sup>ii</sup>] P. Bonasia, D. Gindelbert, B. Dabbousi, J. Arnold, *J. Am. Chem. Soc.*, **1992**, *114*, 5209-5214.
- [<sup>iii</sup>] C. Eaborn, P. B. Hitchcock, J. D. Smith, S. E. Sözerli, *Organometallics*, **1997**, *16*, 5653-5658.
